# Supplementary material for: Biocompatibility and Comfort during Extended Wear of Mel4 Peptide-Coated Antimicrobial Contact Lenses
Source: MDPI journal article supplement (doi:10.3390/antibiotics11010058), 2022-01-03
Supplement: s1 [file s1]

**Table S1:** Modified CLDEQ-8 questionnaire for monocular lens wear

|   |                                                                                                                                                   |                                   |                                    |                                       |                                        |                                        |                            |
|---|---------------------------------------------------------------------------------------------------------------------------------------------------|-----------------------------------|------------------------------------|---------------------------------------|----------------------------------------|----------------------------------------|----------------------------|
| 1 | Questions about <b>EYE DISCOMFORT</b>                                                                                                             |                                   |                                    |                                       |                                        |                                        |                            |
|   | a) During a typical day in the past 2 weeks, how often did your eyes feel discomfort while wearing your contact lenses?                           |                                   |                                    |                                       |                                        |                                        |                            |
|   | Right Eye:                                                                                                                                        | <input type="checkbox"/> 0, Never | <input type="checkbox"/> 1, Rarely | <input type="checkbox"/> 2, Sometimes | <input type="checkbox"/> 3, Frequently | <input type="checkbox"/> 4, Constantly |                            |
|   | Left Eye                                                                                                                                          | <input type="checkbox"/> 0, Never | <input type="checkbox"/> 1, Rarely | <input type="checkbox"/> 2, Sometimes | <input type="checkbox"/> 3, Frequently | <input type="checkbox"/> 4, Constantly |                            |
|   | b) When your eyes felt discomfort with your contact lenses, how intense was this feeling of discomfort...<br>At the end of the day?               |                                   |                                    |                                       |                                        |                                        |                            |
|   | Never Had it                                                                                                                                      |                                   | Not at <u>All Intense</u>          |                                       | Very <u>Intense</u>                    |                                        |                            |
|   | Right Eye:                                                                                                                                        | <input type="checkbox"/> 0        | <input type="checkbox"/> 1         | <input type="checkbox"/> 2            | <input type="checkbox"/> 3             | <input type="checkbox"/> 4             | <input type="checkbox"/> 5 |
|   | Left Eye                                                                                                                                          | <input type="checkbox"/> 0        | <input type="checkbox"/> 1         | <input type="checkbox"/> 2            | <input type="checkbox"/> 3             | <input type="checkbox"/> 4             | <input type="checkbox"/> 5 |
| 2 | Questions about <b>EYE DRYNESS:</b>                                                                                                               |                                   |                                    |                                       |                                        |                                        |                            |
|   | a) During a typical day in the past 2 weeks, how often did your eye feel dry?                                                                     |                                   |                                    |                                       |                                        |                                        |                            |
|   | Right Eye:                                                                                                                                        | <input type="checkbox"/> 0, Never | <input type="checkbox"/> 1, Rarely | <input type="checkbox"/> 2, Sometimes | <input type="checkbox"/> 3, Frequently | <input type="checkbox"/> 4, Constantly |                            |
|   | Left Eye                                                                                                                                          | <input type="checkbox"/> 0, Never | <input type="checkbox"/> 1, Rarely | <input type="checkbox"/> 2, Sometimes | <input type="checkbox"/> 3, Frequently | <input type="checkbox"/> 4, Constantly |                            |
|   | b) When your eyes felt dry, how intense was this feeling of dryness...At the end of the day?                                                      |                                   |                                    |                                       |                                        |                                        |                            |
|   | Never Had it                                                                                                                                      |                                   | Not at <u>All Intense</u>          |                                       | Very <u>Intense</u>                    |                                        |                            |
|   | Right Eye:                                                                                                                                        | <input type="checkbox"/> 0        | <input type="checkbox"/> 1         | <input type="checkbox"/> 2            | <input type="checkbox"/> 3             | <input type="checkbox"/> 4             | <input type="checkbox"/> 5 |
|   | Left Eye                                                                                                                                          | <input type="checkbox"/> 0        | <input type="checkbox"/> 1         | <input type="checkbox"/> 2            | <input type="checkbox"/> 3             | <input type="checkbox"/> 4             | <input type="checkbox"/> 5 |
| 3 | Questions about <b>CHANGEABLE, BLURRY VISION:</b>                                                                                                 |                                   |                                    |                                       |                                        |                                        |                            |
|   | a) During a typical day in the past 2 weeks, how often did your vision change between clear and burry or foggy while wearing your contact lenses? |                                   |                                    |                                       |                                        |                                        |                            |
|   | Right Eye:                                                                                                                                        | <input type="checkbox"/> 0, Never | <input type="checkbox"/> 1, Rarely | <input type="checkbox"/> 2, Sometimes | <input type="checkbox"/> 3, Frequently | <input type="checkbox"/> 4, Constantly |                            |
|   | Left Eye                                                                                                                                          | <input type="checkbox"/> 0, Never | <input type="checkbox"/> 1, Rarely | <input type="checkbox"/> 2, Sometimes | <input type="checkbox"/> 3, Frequently | <input type="checkbox"/> 4, Constantly |                            |
|   | b) When your vision was blurry, how noticeable was the changeable, blurry, or foggy vision ... At the end of the day?                             |                                   |                                    |                                       |                                        |                                        |                            |
|   | Never Had it                                                                                                                                      |                                   | Not at <u>All Intense</u>          |                                       | Very <u>Intense</u>                    |                                        |                            |
|   | Right Eye:                                                                                                                                        | <input type="checkbox"/> 0        | <input type="checkbox"/> 1         | <input type="checkbox"/> 2            | <input type="checkbox"/> 3             | <input type="checkbox"/> 4             | <input type="checkbox"/> 5 |
|   | Left Eye                                                                                                                                          | <input type="checkbox"/> 0        | <input type="checkbox"/> 1         | <input type="checkbox"/> 2            | <input type="checkbox"/> 3             | <input type="checkbox"/> 4             | <input type="checkbox"/> 5 |
| 4 | Questions about <b>CLOSING YOUR EYES:</b>                                                                                                         |                                   |                                    |                                       |                                        |                                        |                            |

|   |                                                                                                                                                                                                               |                                   |                                                   |                                       |                                                  |                                        |                                                 |
|---|---------------------------------------------------------------------------------------------------------------------------------------------------------------------------------------------------------------|-----------------------------------|---------------------------------------------------|---------------------------------------|--------------------------------------------------|----------------------------------------|-------------------------------------------------|
|   | During a typical day in the past 2 weeks, how often did your eyes bother you so much that you wanted to close them?                                                                                           |                                   |                                                   |                                       |                                                  |                                        |                                                 |
|   | Right Eye:                                                                                                                                                                                                    | <input type="checkbox"/> 0, Never | <input type="checkbox"/> 1, Rarely                | <input type="checkbox"/> 2, Sometimes | <input type="checkbox"/> 3, Frequently           | <input type="checkbox"/> 4, Constantly |                                                 |
|   | Left Eye                                                                                                                                                                                                      | <input type="checkbox"/> 0, Never | <input type="checkbox"/> 1, Rarely                | <input type="checkbox"/> 2, Sometimes | <input type="checkbox"/> 3, Frequently           | <input type="checkbox"/> 4, Constantly |                                                 |
| 5 | Questions about <b>REMOVING YOUR LENSES</b>                                                                                                                                                                   |                                   |                                                   |                                       |                                                  |                                        |                                                 |
|   | How often during the past 2 weeks, did your eyes <i>bother you so much</i> while wearing your contact lenses that you felt as if you needed to stop whatever you were doing and take out your contact lenses? |                                   |                                                   |                                       |                                                  |                                        |                                                 |
|   | Right Eye:                                                                                                                                                                                                    | <input type="checkbox"/> 1, Never | <input type="checkbox"/> 2, Less than once a week | <input type="checkbox"/> 3, Weekly    | <input type="checkbox"/> 4, Several times a week | <input type="checkbox"/> 5, Daily      | <input type="checkbox"/> 6, Several times a day |
|   | Left Eye                                                                                                                                                                                                      | <input type="checkbox"/> 1, Never | <input type="checkbox"/> 2, Less than once a week | <input type="checkbox"/> 3, Weekly    | <input type="checkbox"/> 4, Several times a week | <input type="checkbox"/> 5, Daily      | <input type="checkbox"/> 6, Several times a day |

**Table S2:** Ocular and subjective responses at baseline visit prior to lens wear and at the 4M study visit, one month after cessation of contact lens wear.

| Variables                     | Visits with Lens | Sample (n) | Mel4 Lens                 | Control Lens              | Linear Mixed Model      |       |               |
|-------------------------------|------------------|------------|---------------------------|---------------------------|-------------------------|-------|---------------|
|                               |                  |            | (Mean±SD)/ Median & Range | (Mean±SD)/ Median & Range | Lens (Mel4 vs. Control) | Visit | Lens vs Visit |
| Conjunctival responses        |                  |            |                           |                           |                         |       |               |
| Bulbar Redness (0-4,0.1)      | BL               | 208        | 1.3±0.2                   | 1.3±0.2                   | 1.000                   | 0.001 | 1.000         |
|                               | 4M               | 129        | 1.5±0.2                   | 1.5±0.2                   |                         |       |               |
| Limbal Redness (0-4,0.1)      | BL               | 208        | 1.1±0.3                   | 1.1±0.3                   | 0.440                   | 0.001 | 0.438         |
|                               | 4M               | 129        | 1.3±0.2                   | 1.3±0.2                   |                         |       |               |
| Palpebral Redness (0-4,0.1)   | BL               | 208        | 1.4±0.3                   | 1.4±0.3                   | 0.769                   | 0.001 | 0.670         |
|                               | 4M               | 129        | 1.5±0.2                   | 1.5±0.2                   |                         |       |               |
| Palpebral Roughness (0-4,0.1) | BL               | 208        | 1.2±0.3                   | 1.2±0.3                   | 0.295                   | 0.001 | 0.975         |
|                               | 4M               | 129        | 1.3±0.2                   | 1.3±0.2                   |                         |       |               |
| Corneal responses             |                  |            |                           |                           |                         |       |               |
| Centre (Extent; 0-4,1)        | BL               | 208        | 0 (0-0)                   | 0 (0-0)                   | 0.135                   | 0.180 | 0.052         |
|                               | 4M               | 126*       | 0 (0-1)                   | 0 (0-0)                   |                         |       |               |
| Centre (Depth; 0-4,1)         | BL               | 208        | 0 (0-0)                   | 0 (0-0)                   | 0.135                   | 0.180 | 0.052         |
|                               | 4M               | 126*       | 0 (0-1)                   | 0 (0-0)                   |                         |       |               |
| Centre (Type; 0-4,0.5)        | BL               | 208        | 0 (0-0)                   | 0 (0-0)                   | 0.135                   | 0.180 | 0.052         |
|                               | 4M               | 126*       | 0 (0-2)                   | 0 (0-0)                   |                         |       |               |
| Nasal (Extent; 0-4,1)         | BL               | 208        | 0 (0-1)                   | 0 (0-1)                   | 0.577                   | 0.205 | 0.056         |
|                               | 4M               | 126*       | 0 (0-1)                   | 0 (0-0)                   |                         |       |               |
| Nasal (Depth; 0-4,1)          | BL               | 208        | 0 (0-1)                   | 0 (0-1)                   | 0.577                   | 0.205 | 0.056         |
|                               | 4M               | 126*       | 0 (0-1)                   | 0 (0-0)                   |                         |       |               |
| Nasal (Type; 0-4,0.5)         | BL               | 208        | 0 (0-1)                   | 0 (0-1)                   | 0.728                   | 0.135 | 0.066         |
|                               | 4M               | 126*       | 0 (0-1)                   | 0 (0-0)                   |                         |       |               |
| Temporal (Extent; 0-4,1)      | BL               | 208        | 0 (0-1)                   | 0 (0-1)                   | 0.345                   | 0.529 | 0.234         |
|                               | 4M               | 126*       | 0 (0-1)                   | 0 (0-1)                   |                         |       |               |

|                                 |    |      |         |           |       |       |       |
|---------------------------------|----|------|---------|-----------|-------|-------|-------|
| Temporal<br>(Depth; 0-4,1)      | BL | 208  | 0 (0-1) | 0 (0-1)   | 0.345 | 0.529 | 0.234 |
|                                 | 4M | 126* | 0 (0-1) | 0 (0-1)   |       |       |       |
| Temporal<br>(Type; 0-4,0.5)     | BL | 208  | 0 (0-1) | 0 (0-1)   | 0.161 | 0.647 | 0.161 |
|                                 | 4M | 126* | 0 (0-1) | 0 (0-0.5) |       |       |       |
| Superior<br>(Extent; 0-4,1)     | BL | 208  | 0 (0-1) | 0 (0-0)   | 0.577 | 0.807 | 0.076 |
|                                 | 4M | 126* | 0 (0-0) | 0 (0-1)   |       |       |       |
| Superior<br>(Depth; 0-4,1)      | BL | 208  | 0 (0-1) | 0 (0-0)   | 0.577 | 0.807 | 0.076 |
|                                 | 4M | 126* | 0 (0-0) | 0 (0-1)   |       |       |       |
| Superior<br>(Type; 0-4,0.5)     | BL | 208  | 0 (0-1) | 0 (0-0)   | 0.577 | 0.807 | 0.076 |
|                                 | 4M | 126* | 0 (0-0) | 0 (0-1)   |       |       |       |
| Inferior<br>(Extent; 0-4,1)     | BL | 208  | 0 (0-1) | 0 (0-1)   | 0.872 | 0.016 | 0.514 |
|                                 | 4M | 126* | 0 (0-1) | 0 (0-1)   |       |       |       |
| Inferior<br>(Depth; 0-4,1)      | BL | 208  | 0 (0-1) | 0 (0-1)   | 0.698 | 0.013 | 0.697 |
|                                 | 4M | 126* | 0 (0-1) | 0 (0-1)   |       |       |       |
| Inferior<br>(Type; 0-4,0.5)     | BL | 208  | 0 (0-1) | 0 (0-1)   | 0.829 | 0.012 | 0.289 |
|                                 | 4M | 126* | 0 (0-1) | 0 (0-1)   |       |       |       |
| Subjective responses            |    |      |         |           |       |       |       |
| Overall<br>comfort<br>(1-100,1) | BL | 208  | 97±4    | 97±4      | 0.671 | 0.001 | 0.671 |
|                                 | 4M | 129  | 94±4    | 94±5      |       |       |       |
| Overall<br>dryness<br>(1-100,1) | BL | 208  | 4±8     | 4±8       | 0.989 | 0.082 | 0.659 |
|                                 | 4M | 129  | 6±4     | 6±4       |       |       |       |

\* Total no. = 129, missed data for three subjects.

**Table S3:** Ocular and subjective responses at dropouts and completed visits.

| Variables<br>(range,<br>incremental<br>steps) | Visits<br>with<br>Lens | Dropouts                 |                                 |                                 | Completed visit                 |                                 |                        |
|-----------------------------------------------|------------------------|--------------------------|---------------------------------|---------------------------------|---------------------------------|---------------------------------|------------------------|
|                                               |                        | No of<br>dropouts<br>(n) | Mel4 Lens                       | Control<br>Lens                 | Mel4 Lens                       | Control<br>Lens                 | Total<br>sample<br>(n) |
|                                               |                        |                          | (Mean±SD)/<br>Median &<br>Range | (Mean±SD)/<br>Median &<br>Range | (Mean±SD)/<br>Median &<br>Range | (Mean±SD)/<br>Median &<br>Range |                        |
| Conjunctival responses                        |                        |                          |                                 |                                 |                                 |                                 |                        |
| Bulbar<br>Redness (0-4,0.1)                   | 2W                     | 4                        | 1.6±0.3                         | 1.6±0.3                         | 1.5±0.2                         | 1.5±0.2                         | 153                    |
|                                               | 1M                     | 2                        | 1.4±0.1                         | 1.4±0.1                         | 1.6±0.2                         | 1.6±0.2                         | 144                    |
|                                               | 3M                     | 2                        | 1.7±0.0                         | 1.7±0.1                         | 1.6±0.2                         | 1.6±0.2                         | 129                    |
| Limbal<br>Redness (0-4,0.1)                   | 2W                     | 4                        | 1.3±0.2                         | 1.3±0.2                         | 1.2±0.2                         | 1.2±0.2                         | 153                    |
|                                               | 1M                     | 2                        | 1.2±0.1                         | 1.2±0.1                         | 1.3±0.3                         | 1.3±0.3                         | 144                    |
|                                               | 3M                     | 2                        | 1.5±0.1                         | 1.5±0.1                         | 1.4±0.2                         | 1.4±0.2                         | 129                    |
| Palpebral<br>Redness<br>(0-4,0.1)             | 2W                     | 4                        | 1.8±0.1                         | 1.8±0.1                         | 1.6±0.3                         | 1.6±0.3                         | 153                    |
|                                               | 1M                     | 2                        | 1.7±0.2                         | 1.7±0.2                         | 1.6±0.3                         | 1.6±0.3                         | 144                    |
|                                               | 3M                     | 2                        | 1.8±0.4                         | 1.7±0.2                         | 1.7±0.3                         | 1.7±0.3                         | 129                    |
| Palpebral<br>Roughness<br>(0-4,0.1)           | 2W                     | 4                        | 1.3±0.2                         | 1.4±0.2                         | 1.3±0.3                         | 1.3±0.3                         | 153                    |
|                                               | 1M                     | 2                        | 1.3±0.1                         | 1.3±0.1                         | 1.3±0.3                         | 1.3±0.3                         | 144                    |
|                                               | 3M                     | 2                        | 1.2±0.3                         | 1.2±0.3                         | 1.4±0.3                         | 1.4±0.3                         | 129                    |
| Corneal responses                             |                        |                          |                                 |                                 |                                 |                                 |                        |
| Centre<br>(Extent; 0-4,1)                     | 2W                     | 4                        | 0 (0-0)                         | 0 (0-0)                         | 0 (0-1)                         | 0 (0-1)                         | 153                    |
|                                               | 1M                     | 2                        | 0 (0-0)                         | 0 (0-0)                         | 0 (0-0)                         | 0 (0-1)                         | 144                    |
|                                               | 3M                     | 2                        | 0 (0-0)                         | 0 (0-0)                         | 0 (0-1)                         | 0 (0-1)                         | 129                    |
| Centre<br>(Depth; 0-4,1)                      | 2W                     | 4                        | 0 (0-0)                         | 0 (0-0)                         | 0 (0-1)                         | 0 (0-1)                         | 153                    |
|                                               | 1M                     | 2                        | 0 (0-0)                         | 0 (0-0)                         | 0 (0-0)                         | 0 (0-1)                         | 144                    |
|                                               | 3M                     | 2                        | 0 (0-0)                         | 0 (0-0)                         | 0 (0-1)                         | 0 (0-1)                         | 129                    |
| Centre<br>(Type; 0-4,0.5)                     | 2W                     | 4                        | 0 (0-0)                         | 0 (0-0)                         | 0 (0-1)                         | 0 (0-1)                         | 153                    |
|                                               | 1M                     | 2                        | 0 (0-0)                         | 0 (0-0)                         | 0 (0-0)                         | 0 (0-1)                         | 144                    |
|                                               | 3M                     | 2                        | 0 (0-0)                         | 0 (0-0)                         | 0 (0-1)                         | 0 (0-1)                         | 129                    |
| Nasal<br>(Extent; 0-4,1)                      | 2W                     | 4                        | 0 (0-0)                         | 0 (0-0)                         | 0 (0-1)                         | 0 (0-1)                         | 153                    |
|                                               | 1M                     | 2                        | 0 (0-0)                         | 0 (0-0)                         | 0 (0-1)                         | 0 (0-2)                         | 144                    |
|                                               | 3M                     | 2                        | 0 (0-0)                         | 0 (0-0)                         | 0 (0-0)                         | 0 (0-1)                         | 129                    |
| Nasal<br>(Depth; 0-4,1)                       | 2W                     | 4                        | 0 (0-0)                         | 0 (0-0)                         | 0 (0-1)                         | 0 (0-1)                         | 153                    |
|                                               | 1M                     | 2                        | 0 (0-0)                         | 0 (0-0)                         | 0 (0-1)                         | 0 (0-2)                         | 144                    |
|                                               | 3M                     | 2                        | 0 (0-0)                         | 0 (0-0)                         | 0 (0-0)                         | 0 (0-1)                         | 129                    |
| Nasal<br>(Type; 0-4,0.5)                      | 2W                     | 4                        | 0 (0-0)                         | 0 (0-0)                         | 0 (0-1)                         | 0 (0-1)                         | 153                    |
|                                               | 1M                     | 2                        | 0 (0-0)                         | 0 (0-0)                         | 0 (0-1)                         | 0 (0-2)                         | 144                    |
|                                               | 3M                     | 2                        | 0 (0-0)                         | 0 (0-0)                         | 0 (0-0)                         | 0 (0-1)                         | 129                    |
| Temporal<br>(Extent; 0-4,1)                   | 2W                     | 4                        | 0 (0-0)                         | 0 (0-0)                         | 0 (0-1)                         | 0 (0-1)                         | 153                    |
|                                               | 1M                     | 2                        | 0 (0-0)                         | 0 (0-0)                         | 0 (0-0)                         | 0 (0-1)                         | 144                    |
|                                               | 3M                     | 2                        | 0 (0-0)                         | 0 (0-0)                         | 0 (0-1)                         | 0 (0-0)                         | 129                    |

|                                          |           |   |           |           |         |           |     |
|------------------------------------------|-----------|---|-----------|-----------|---------|-----------|-----|
| <b>Temporal<br/>(Depth; 0-4,1)</b>       | <b>2W</b> | 4 | 0 (0-0)   | 0 (0-0)   | 0 (0-1) | 0 (0-1)   | 153 |
|                                          | <b>1M</b> | 2 | 0 (0-0)   | 0 (0-0)   | 0 (0-0) | 0 (0-1)   | 144 |
|                                          | <b>3M</b> | 2 | 0 (0-0)   | 0 (0-0)   | 0 (0-1) | 0 (0-0)   | 129 |
| <b>Temporal<br/>(Type; 0-4,0.5)</b>      | <b>2W</b> | 4 | 0 (0-0)   | 0 (0-0)   | 0 (0-1) | 0 (0-1)   | 153 |
|                                          | <b>1M</b> | 2 | 0 (0-0)   | 0 (0-0)   | 0 (0-0) | 0 (0-0.5) | 144 |
|                                          | <b>3M</b> | 2 | 0 (0-0)   | 0 (0-0)   | 0 (0-1) | 0 (0-0)   | 129 |
| <b>Superior<br/>(Extent; 0-4,1)</b>      | <b>2W</b> | 4 | 0 (0-0)   | 0 (0-0)   | 0 (0-1) | 0 (0-1)   | 153 |
|                                          | <b>1M</b> | 2 | 0 (0-0)   | 0 (0-0)   | 0 (0-1) | 0 (0-2)   | 144 |
|                                          | <b>3M</b> | 2 | 0 (0-0)   | 0 (0-0)   | 0 (0-1) | 0 (0-1)   | 129 |
| <b>Superior<br/>(Depth; 0-4,1)</b>       | <b>2W</b> | 4 | 0 (0-0)   | 0 (0-0)   | 0 (0-1) | 0 (0-1)   | 153 |
|                                          | <b>1M</b> | 2 | 0 (0-0)   | 0 (0-0)   | 0 (0-1) | 0 (0-2)   | 144 |
|                                          | <b>3M</b> | 2 | 0 (0-0)   | 0 (0-0)   | 0 (0-1) | 0 (0-1)   | 129 |
| <b>Superior<br/>(Type; 0-4,0.5)</b>      | <b>2W</b> | 4 | 0 (0-0)   | 0 (0-0)   | 0 (0-1) | 0 (0-0.5) | 153 |
|                                          | <b>1M</b> | 2 | 0 (0-0)   | 0 (0-0)   | 0 (0-1) | 0 (0-1.5) | 144 |
|                                          | <b>3M</b> | 2 | 0 (0-0)   | 0 (0-0)   | 0 (0-1) | 0 (0-1)   | 129 |
| <b>Inferior<br/>(Extent; 0-4,1)</b>      | <b>2W</b> | 4 | 0 (0-0)   | 0 (0-1)   | 0 (0-1) | 0 (0-2)   | 153 |
|                                          | <b>1M</b> | 2 | 1 (0-1)   | 1 (0-1)   | 0 (0-1) | 0 (0-2)   | 144 |
|                                          | <b>3M</b> | 2 | 0 (0-0)   | 0 (0-0)   | 0 (0-2) | 0 (0-2)   | 129 |
| <b>Inferior<br/>(Depth; 0-4,1)</b>       | <b>2W</b> | 4 | 0 (0-0)   | 0 (0-1)   | 0 (0-1) | 0 (0-2)   | 153 |
|                                          | <b>1M</b> | 2 | 1 (0-1)   | 1 (0-1)   | 0 (0-1) | 0 (0-2)   | 144 |
|                                          | <b>3M</b> | 2 | 0 (0-0)   | 0 (0-0)   | 0 (0-2) | 0 (0-2)   | 129 |
| <b>Inferior<br/>(Type; 0-4,0.5)</b>      | <b>2W</b> | 4 | 0 (0-0)   | 0 (0-1)   | 0 (0-1) | 0 (0-2)   | 153 |
|                                          | <b>1M</b> | 2 | 1.5 (1-2) | 0.5 (0-1) | 0 (0-1) | 0 (0-2)   | 144 |
|                                          | <b>3M</b> | 2 | 0 (0-0)   | 0 (0-0)   | 0 (0-2) | 0 (0-2)   | 129 |
| <b>Subjective responses</b>              |           |   |           |           |         |           |     |
| <b>Overall<br/>comfort<br/>(1-100,1)</b> | <b>2W</b> | 4 | 96±5      | 96±5      | 91±7    | 91±8      | 153 |
|                                          | <b>1M</b> | 2 | 60±42     | 60±42     | 90±7    | 91±9      | 144 |
|                                          | <b>3M</b> | 2 | 93±4      | 93±4      | 88±8    | 89±7      | 129 |
| <b>Overall<br/>dryness<br/>(1-100,1)</b> | <b>2W</b> | 4 | 4±4       | 4±4       | 11±11   | 11±11     | 153 |
|                                          | <b>1M</b> | 2 | 45±49     | 45±49     | 11±11   | 12±12     | 144 |
|                                          | <b>3M</b> | 2 | 8±4       | 8±4       | 13±11   | 13±11     | 129 |
| <b>Edge<br/>awareness<br/>(0-10,1)</b>   | <b>2W</b> | 4 | 1 (1-2)   | 1 (1-1)   | 1 (1-4) | 1 (1-5)   | 153 |
|                                          | <b>1M</b> | 2 | 1 (1-1)   | 1 (1-1)   | 1 (1-3) | 1 (1-3)   | 144 |
|                                          | <b>3M</b> | 2 | 1 (1-1)   | 1 (1-1)   | 1 (1-3) | 1 (1-3)   | 129 |
| <b>Lens<br/>awareness<br/>(0-10,1)</b>   | <b>2W</b> | 4 | 1 (1-1)   | 1 (1-1)   | 1 (1-4) | 1 (1-4)   | 153 |
|                                          | <b>1M</b> | 2 | 1 (1-1)   | 1 (1-1)   | 1 (1-3) | 1 (1-3)   | 144 |
|                                          | <b>3M</b> | 2 | 1 (1-1)   | 1 (1-1)   | 1 (1-3) | 1 (1-3)   | 129 |

**Table S4:** Lens surface characteristics and fit characteristics of Mel4 and control contact lenses at dropouts and completed visits.

| Variables<br>(range,<br>incremental<br>steps) | Visit<br>s<br>with<br>Lens | Dropouts                  |                                  |                                 | Completed visit                 |                                 |                        |
|-----------------------------------------------|----------------------------|---------------------------|----------------------------------|---------------------------------|---------------------------------|---------------------------------|------------------------|
|                                               |                            | No of<br>dropou<br>ts (n) | Mel4 Lens                        | Control Lens                    | Mel4 Lens                       | Control Lens                    | Total<br>sample<br>(n) |
|                                               |                            |                           | (Mean±SD)<br>/ Median &<br>Range | (Mean±SD)/<br>Median &<br>Range | (Mean±SD)/<br>Median &<br>Range | (Mean±SD)/<br>Median &<br>Range |                        |
| Lens surface characteristics                  |                            |                           |                                  |                                 |                                 |                                 |                        |
| Front<br>surface<br>wetting<br>(0-4,0.1)      | 2W                         | 4                         | 3.7±0.1                          | 3.7±0.1                         | 3.6±0.3                         | 3.6±0.3                         | 153                    |
|                                               | 1M                         | 2                         | 3.5±0.1                          | 3.5±0.0                         | 3.6±0.3                         | 3.5±0.3                         | 144                    |
|                                               | 3M                         | 2                         | 3.4±0.6                          | 3.4±0.6                         | 3.6±0.3                         | 3.5±0.3                         | 129                    |
| Front<br>surface<br>deposits<br>(0-4,0.1)     | 2W                         | 4                         | 0.2±0.2                          | 0.2±0.2                         | 0.6±0.5                         | 0.6±0.5                         | 153                    |
|                                               | 1M                         | 2                         | 0.8±0.4                          | 0.8±0.4                         | 0.6±0.6                         | 0.6±0.6                         | 144                    |
|                                               | 3M                         | 2                         | 1.0±0.7                          | 1.0±0.7                         | 0.7±0.6                         | 0.7±0.6                         | 129                    |
| Back<br>surface<br>debris<br>(0-4,0.1)        | 2W                         | 4                         | 0.2±0.2                          | 0.2±0.2                         | 0.3±0.4                         | 0.3±0.4                         | 153                    |
|                                               | 1M                         | 2                         | 0.8±0.4                          | 0.8±0.4                         | 0.4±0.5                         | 0.4±0.5                         | 144                    |
|                                               | 3M                         | 2                         | 1.0±0.7                          | 1.0±0.7                         | 0.4±0.5                         | 0.4±0.5                         | 129                    |
| Lens fit characteristics                      |                            |                           |                                  |                                 |                                 |                                 |                        |
| Centration<br>X-axis<br>(-1to+1, 0.1<br>mm)   | 2W                         | 4                         | 0 (0.0 - 0.3)                    | 0 (0.0 - 0.3)                   | 0 (-0.3 - 0.2)                  | 0 (-0.3 - 0.2)                  | 153                    |
|                                               | 1M                         | 2                         | 0 (0 - 0)                        | 0 (0 - 0)                       | 0 (-0.5 - 0.2)                  | 0 (-0.5 - 0.0)                  | 144                    |
|                                               | 3M                         | 2                         | 0 (0 - 0)                        | 0 (0 - 0)                       | 0 (-0.3 - 0.2)                  | 0 (-0.3 - 0.2)                  | 129                    |
| Centration<br>Y-axis<br>(-1to+1, 0.1<br>mm)   | 2W                         | 4                         | 0.1 (-0.3 - 0.3)                 | 0.1 (-0.3 - 0.3)                | 0 (-0.3 - 0.5)                  | 0 (-0.3 - 0.5)                  | 153                    |
|                                               | 1M                         | 2                         | 0 (0 - 0)                        | 0 (0 - 0)                       | 0 (-0.4 - 0.4)                  | 0 (-0.3 - 0.4)                  | 144                    |
|                                               | 3M                         | 2                         | 0 (0 - 0)                        | 0 (0 - 0)                       | 0 (-0.2 - 0.3)                  | 0 (-0.2 - 0.3)                  | 129                    |
| Primary<br>gaze<br>movement<br>(0-10,0.1)     | 2W                         | 4                         | 0.4±0.1                          | 0.3±0.1                         | 0.4±0.1                         | 0.4±0.1                         | 153                    |
|                                               | 1M                         | 2                         | 0.3±0.0                          | 0.3±0.0                         | 0.4±0.1                         | 0.4±0.1                         | 144                    |
|                                               | 3M                         | 2                         | 0.4±0.0                          | 0.4±0.0                         | 0.4±0.1                         | 0.4±0.1                         | 129                    |
| Primary<br>gaze lag (0-<br>10,0.1)            | 2W                         | 4                         | 0.1±0.1                          | 0.1±0.1                         | 0.1±0.1                         | 0.1±0.1                         | 153                    |
|                                               | 1M                         | 2                         | 0.2±0.1                          | 0.2±0.1                         | 0.2±0.1                         | 0.2±0.1                         | 144                    |
|                                               | 3M                         | 2                         | 0.2±0.0                          | 0.2±0.0                         | 0.2±0.1                         | 0.2±0.1                         | 129                    |
| Tightness<br>(0-100,1) %                      | 2W                         | 4                         | 41±3                             | 41±3                            | 42±3                            | 42±3                            | 153                    |
|                                               | 1M                         | 2                         | 40±0                             | 40±0                            | 41±3                            | 41±3                            | 144                    |
|                                               | 3M                         | 2                         | 40±0                             | 40±0                            | 42±3                            | 42±3                            | 129                    |
| Overall<br>Acceptance<br>(0-4,0.1)            | 2W                         | 4                         | 3.7±0.2                          | 3.7±0.2                         | 3.8±0.1                         | 3.8±0.1                         | 153                    |
|                                               | 1M                         | 2                         | 3.9±0.1                          | 3.9±0.1                         | 3.8±0.1                         | 3.8±0.1                         | 144                    |
|                                               | 3M                         | 2                         | 3.8±0.0                          | 3.8±0.0                         | 3.8±0.1                         | 3.8±0.1                         | 129                    |
